# Supplementary material
Source: publisher figshare collection journal article supplement (https://diabetesjournals.figshare.com/ndownloader/files/22701092)
Supplement: Supplementary file 1 [file 22701092]

**The GDS Group** consists of Michael Roden (speaker), Hadi Al-Hasani, Bengt F. Belgardt, Volker Burkart, Anette E. Buyken, Gerd Geerling, Christian Herder, Jong-Hee Hwang, Andrea Icks, Karin Jandeleit-Dahm, Sabine Kahl, Jörg Kotzka, Oliver Kuss, Eckhard Lammert, Wolfgang Rathmann, Julia Szendroedi, Sandra Trenkamp, Dan Ziegler and their co-workers who are responsible for the design and conduct of the GDS.

Affiliations: M. Roden1,2,3, H. Al-Hasani3,4, B. F. Belgardt3,5, V. Burkart1,3, A. E. Buyken6, G. Geerling7, C. Herder1,3, J-H.Hwang1,3, A. Icks3,8, K. Jandeleit-Dahm1,3,9, S. Kahl1,3, J. Kotzka3,4, O. Kuß3,10, E. Lammert3,5, W. Rathmann3,10, J. Szendroedi1,2,3, S. Trenkamp1,3, D. Ziegler1,2,3

1 Institute for Clinical Diabetology, German Diabetes Center, Leibniz Institute for Diabetes Research at Heinrich Heine University, Düsseldorf, Germany.

2 Division of Endocrinology and Diabetology, Medical Faculty, Heinrich Heine University, Düsseldorf, Germany.

3 German Center for Diabetes Research (DZD e.V.), München-Neuherberg, Germany.

4 Institute for Clinical Biochemistry and Pathobiochemistry, German Diabetes Center, Leibniz Institute for Diabetes Research at Heinrich Heine University, Düsseldorf, Germany.

5 Institute for Vascular and Islet Cell Biology, German Diabetes Center, Leibniz Institute for Diabetes Research at Heinrich Heine University, Düsseldorf, Germany.

6 Institute of Nutrition, Consumption, and Health, Faculty of Natural Sciences, University of Paderborn, Paderborn, Germany.

7 Department of Ophthalmology, University Hospital Düsseldorf, Düsseldorf, Germany.

8 Institute for Health Services Research and Health Economics, German Diabetes Center, Leibniz Institute for Diabetes Research at Heinrich Heine University, Düsseldorf, Germany.

9 Department of Diabetes, Central Clinical School, Monash University, Melbourne, Australia.

10 Institute for Biometrics and Epidemiology, German Diabetes Center, Leibniz Institute for Diabetes Research at Heinrich Heine University, Düsseldorf, Germany.
